# Supplementary material for: Resistant starch and tannic acid synergistically ameliorated dextran sulfate sodium-induced ulcerative colitis, particularly in the distal colon
Source: Royal Society of Chemistry journal article supplement (doi:10.1039/d4fo00531g), 2024-01-01

**Fig. S1** The images of the proximal and distal colon after H&E staining (the magnification at 400×; arrows, inflammatory cell infiltration).

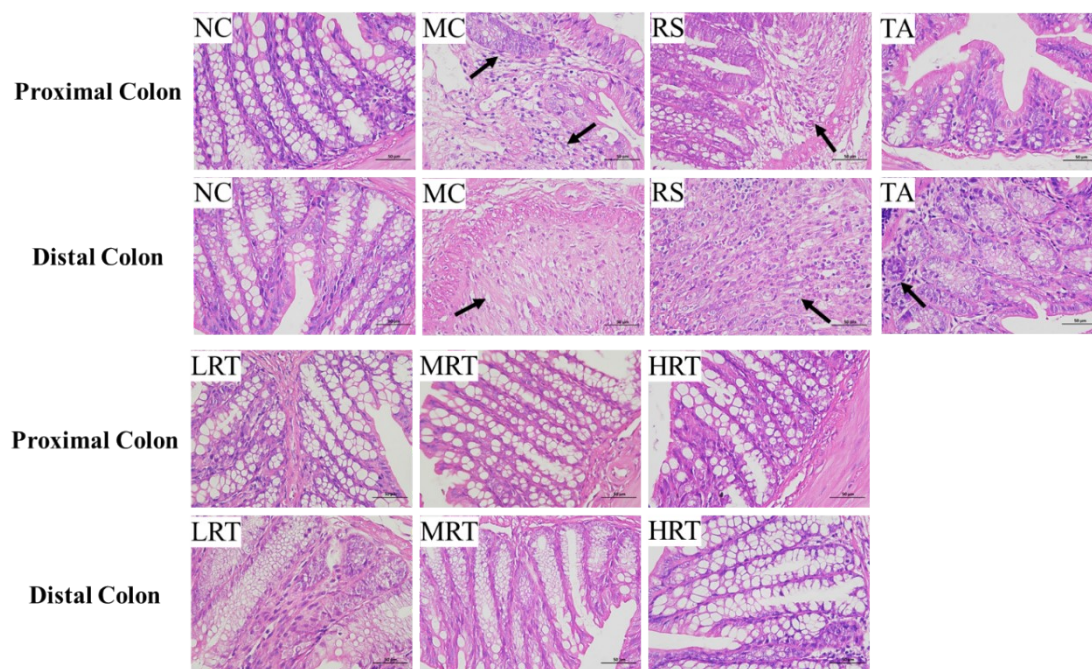

Supplement: d4fo00531g1.pdf [file d4fo00531g1.pdf]
